# Supplementary material for: Phospholipid-rich krill oil promotes intestinal health by strengthening beneficial gut microbial interactions in an infectious colitis model
Source: Royal Society of Chemistry journal article supplement (doi:10.1039/d3fo04980a), 2024-01-01
Supplement: d3fo04980a1.pdf [file d3fo04980a1.pdf]

Supplementary information

**Phospholipid-rich krill oil promotes intestinal health by strengthening beneficial gut microbial interactions in an infectious colitis model**

Fang Liu\*, Allen D. Smith, Thomas T. Y. Wang, Quynhchi Pham, Pengfen Hou

Lumei Cheung, Haiyan Yang\*, Robert W. Li\*

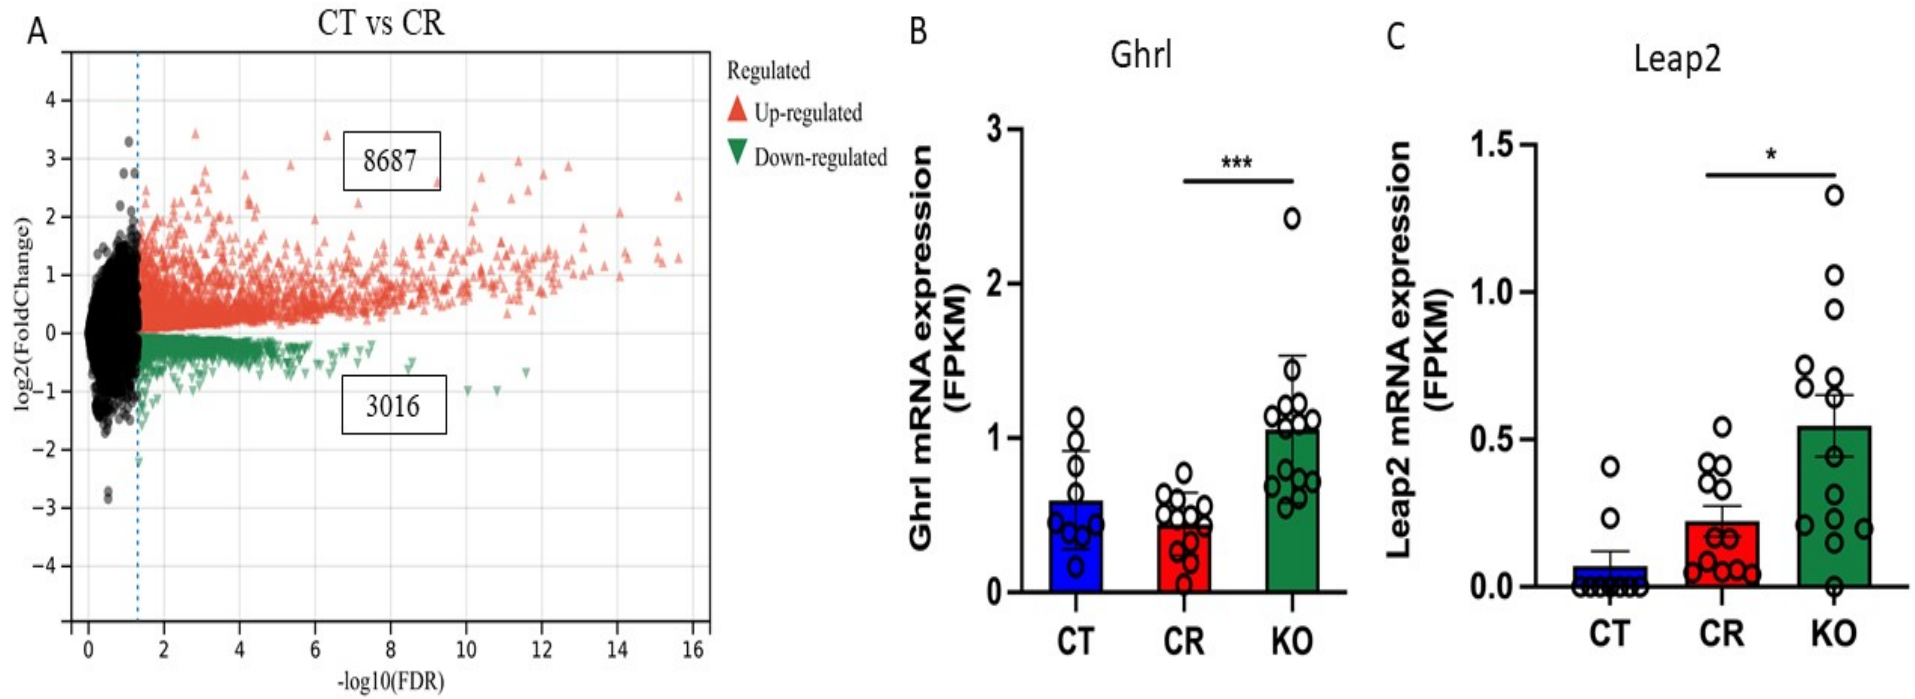

**Figure S1.** *Citrobacter rodentium* infection induced a significant alteration in the intestinal transcriptome. A. the volcano plot showing the number of genes significantly regulated by infection. Red: upregulated; Green: downregulated. FDR: False discovery rate. Krill oil increased the expression of both ghrelin receptor (Ghrl, B) and its endogenous antagonist Leap2 (C) by the same extent. CT: Uninfected control. CR: *Citrobacter rodentium* infected mice supplemented with PBS for 26 days. KO: *Citrobacter rodentium* infected mice supplemented with krill oil at 40 mg/Kg BW/day for 26 days. The *P* value was calculated using the Wilcoxon Rank Sum Test (CR vs KO). \*  $P < 0.05$ ; \*\*\*  $P < 0.001$ .

A.

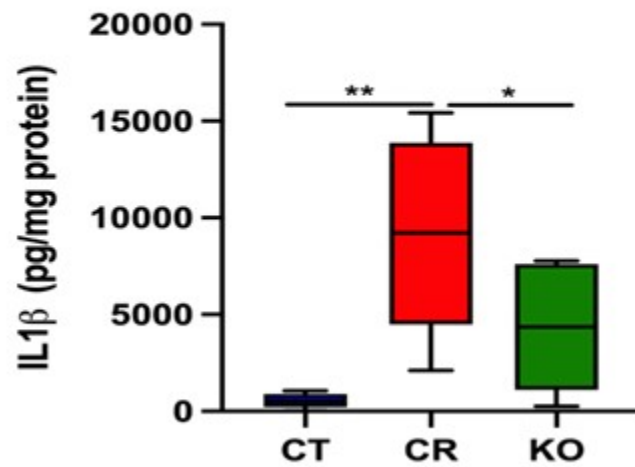

B.

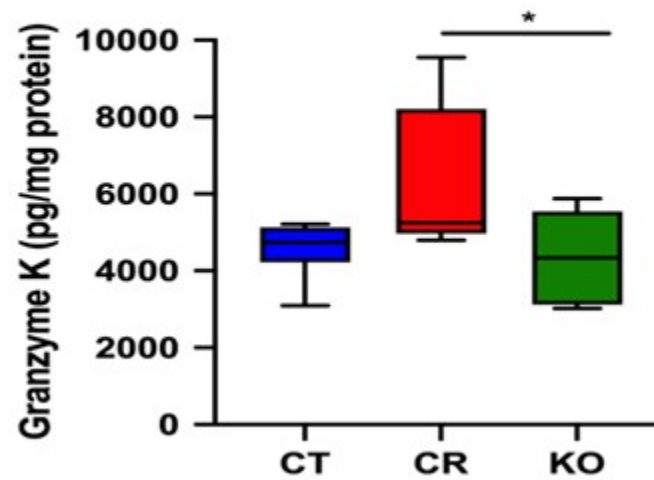

**Figure S2.** The IL1 $\beta$  and granzyme K protein levels in the colon homogenate as detected by ELISA assay. A: IL1 $\beta$ ; B: Granzyme K (GzmK). The protein level, as expressed as pg per mg total protein, was derived from the standard curve in the ELISA kit. CT: Uninfected control. CR: *Citrobacter rodentium* infected mice supplemented with PBS for 26 days. KO: *Citrobacter rodentium* infected mice supplemented with krill oil at 40 mg/Kg BW/day for 26 days. \*:  $P < 0.05$ ; \*\*:  $P < 0.01$ .

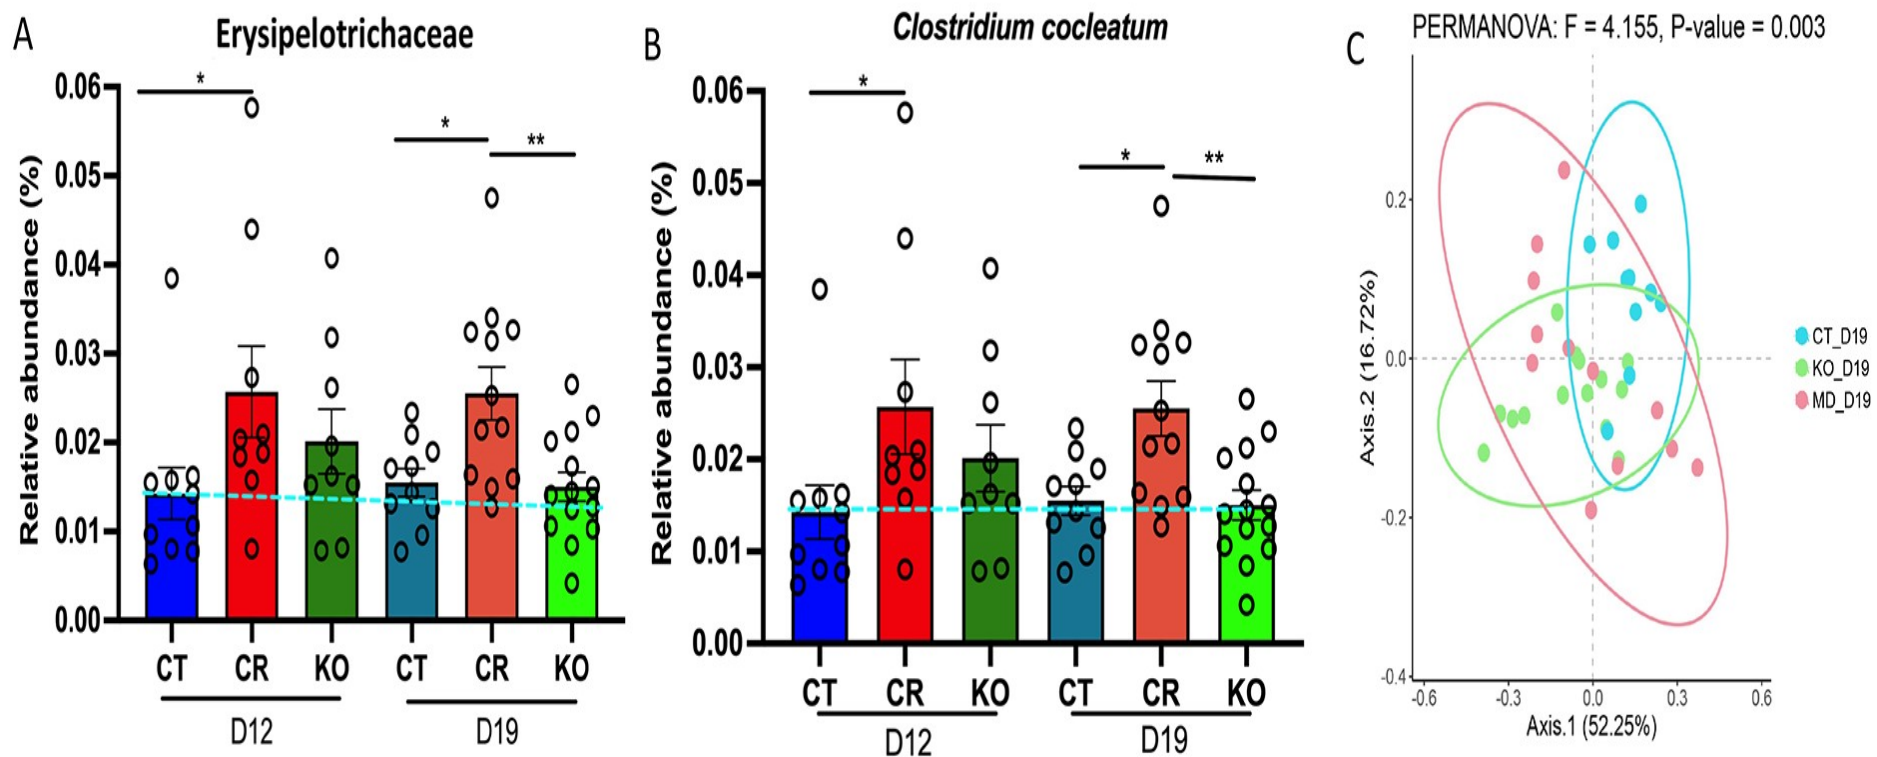

**Figure S3. *Citrobacter rodentium* infection induced a marked change in the gut microbial community.** CT: Uninfected control. CR: *Citrobacter rodentium* infected mice supplemented with PBS for 26 days. KO: *Citrobacter rodentium* infected mice supplemented with krill oil at 40 mg/Kg BW/day for 26 days. The *P* value was calculated using the Wilcoxon Rank Sum Test (CR vs KO). A: The relative abundance of an unassigned genus in the family *Erysipelotrichaceae*. B: *Clostridium cocleatum*. C: Beta-diversity analyzed using PERMANOVA. D12: 12 days post-infection. D19: 19 days post infection. \*:  $P < 0.05$ ; \*\*:  $P < 0.01$ .

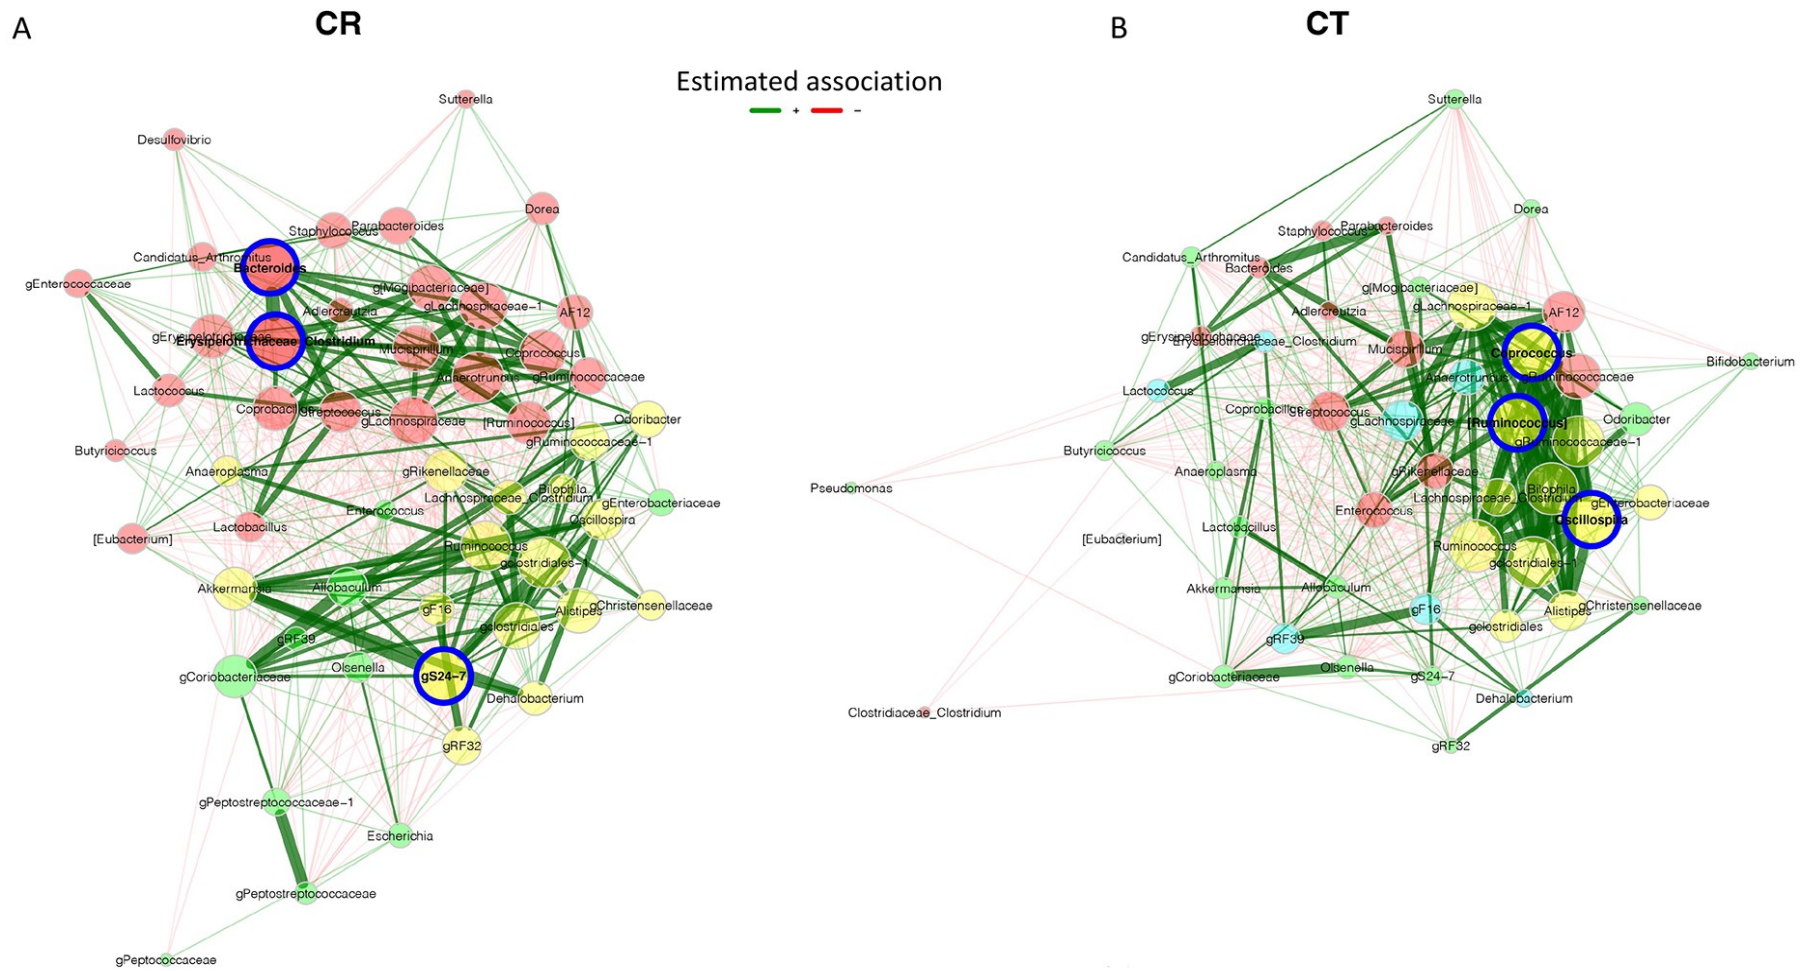

**Figure S4. Microbial interactions predicted by the NetCoMi algorithm in gut microbial communities.** The node color represents the module. The edge color denotes the direction of the microbial interactions (positive or negative) between nodes in each network. CT: Uninfected mice. CR: *Citrobacter rodentium* infected mice. The bold font with a colored border represents the hub taxa. The width of the edge denotes the strength of each interaction.

# Differential network

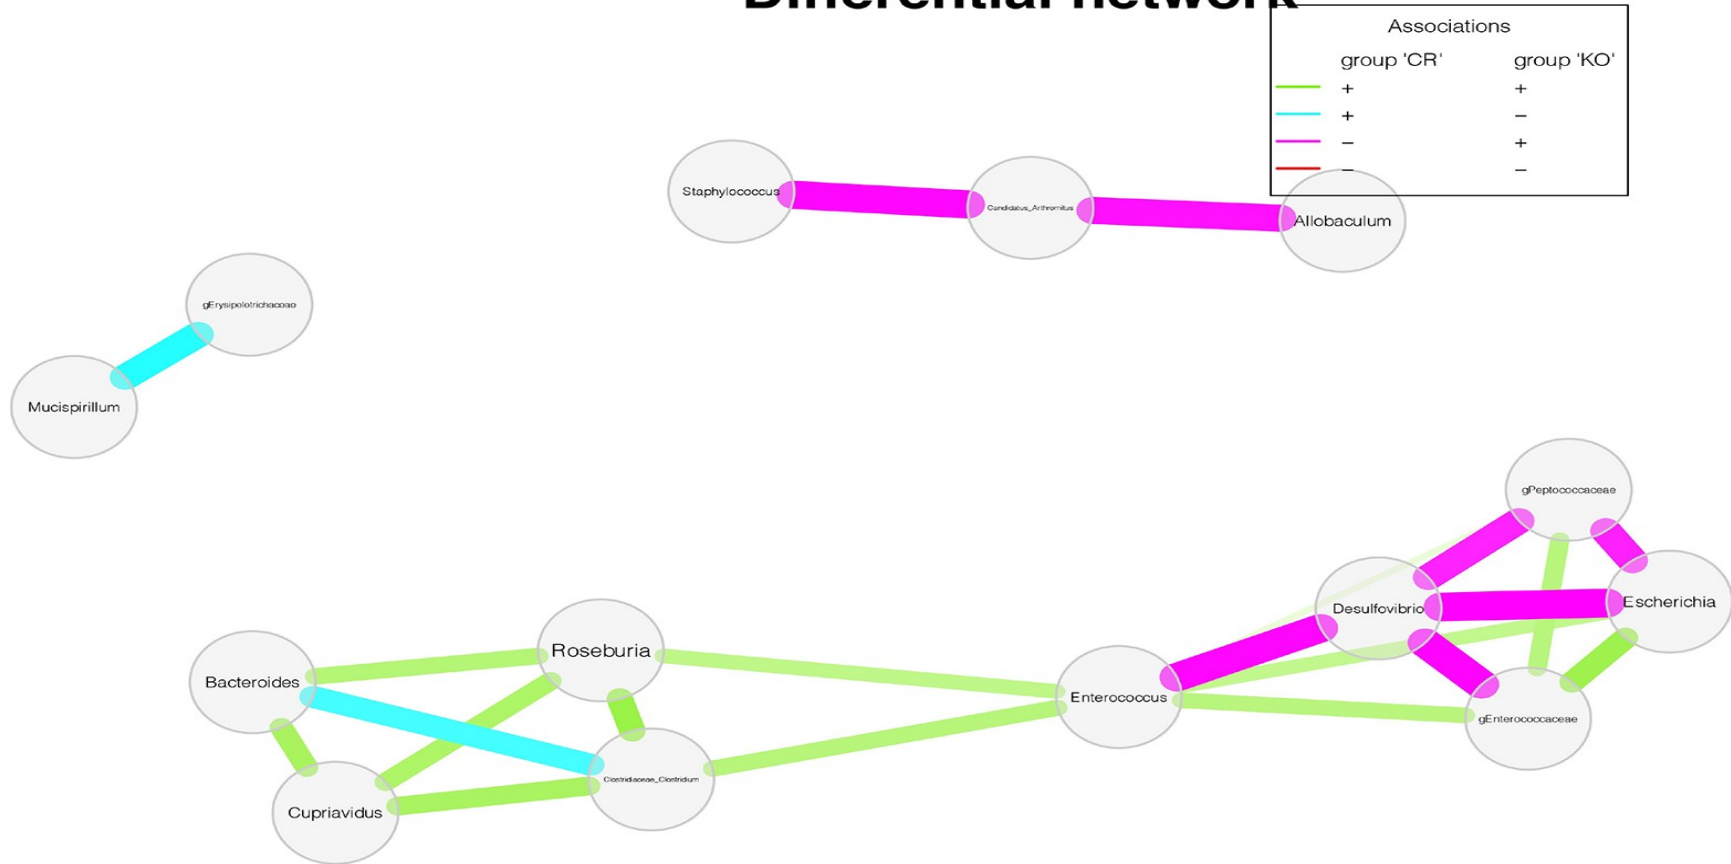

**Figure S5.** Differential network analysis. The color of the edges represents the differential interactions (associations) between the nodes as specified in the legend.



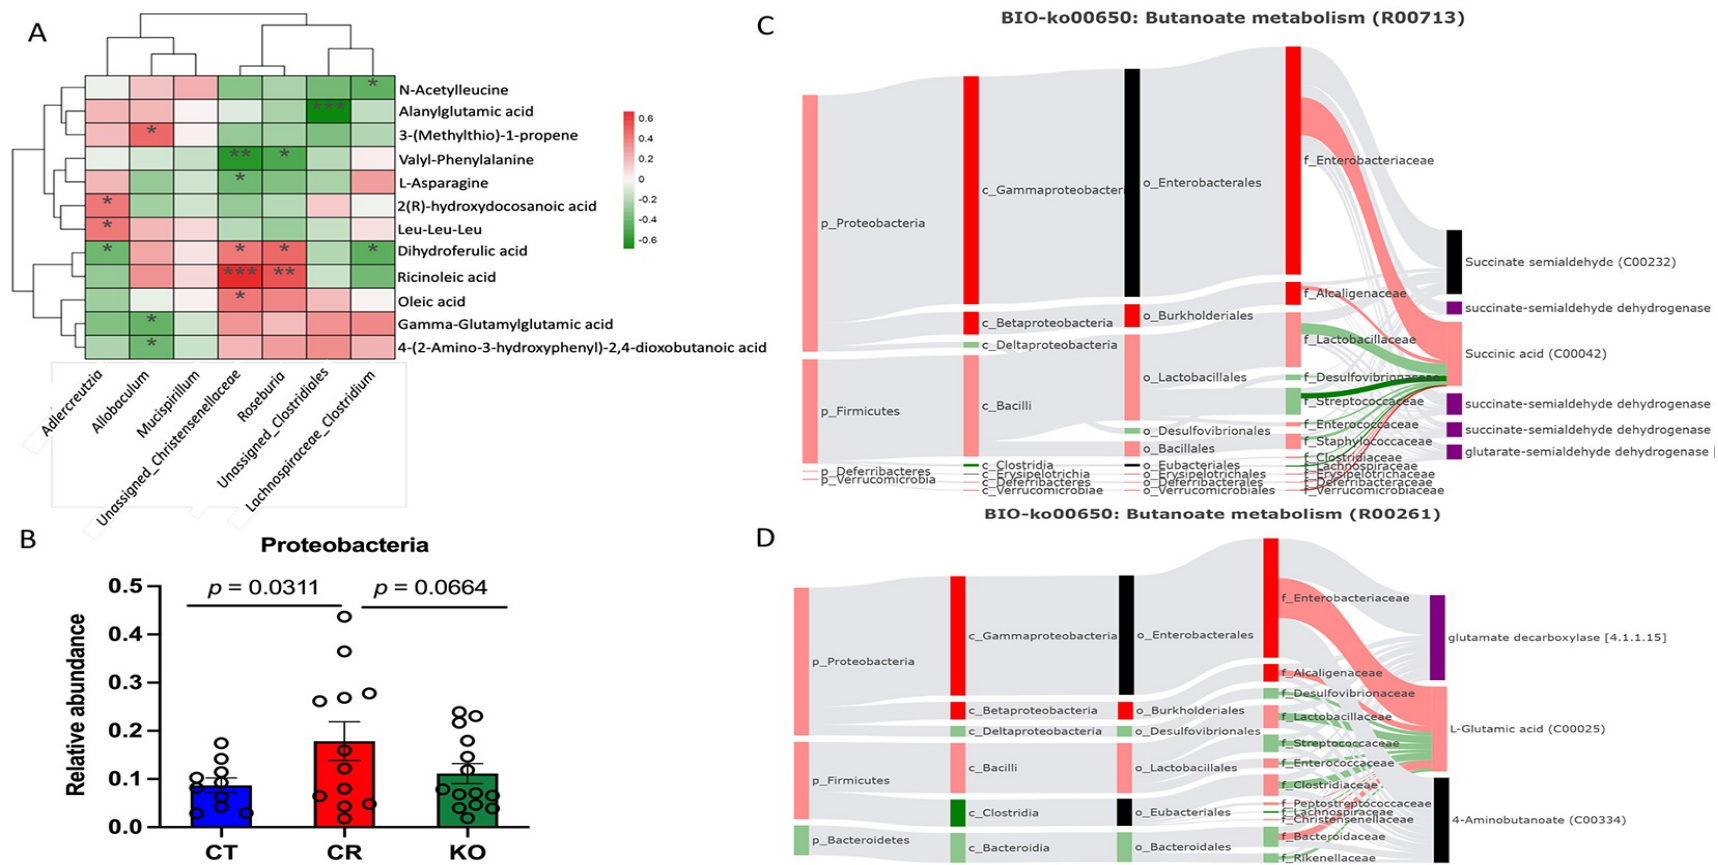

**Figure S6.** The correlation between select gut luminal metabolites and microbial genera modulated by krill oil in infectious colitis mice. **A:** The correlation between select metabolites and microbial taxa detected using Spearman rank correlation. **B:** Krill oil supplementation reduced the abundance of a pro-inflammatory phylum, Proteobacteria, which was predicted to be involved in multiple metabolic pathways by the MetOrigin algorithm. **C:** Association networks between metabolites and gut microbiota features (taxa) in the butyrate metabolism pathways (KEGG ko00650) based on the origin of metabolites using the Sankey network algorithm. **C:** The metabolic reaction R00713 and **D:** The metabolic reaction R00261. The red/green bands indicate the direction of the statistical correlations (red = positive and green = negative) and the dark color represents the statistically significant correlations ( $P < 0.05$ ).

**Table S1. Composition analysis of krill oil used in the study.**

| <b>Composition</b>      | <b>Unit</b>                     | <b>Content</b> |
|-------------------------|---------------------------------|----------------|
| Total phospholipids     | g/Kg KO                         | 500.0          |
| Total Omega-3           | g/Kg KO                         | 260.0          |
| EPA                     | g/Kg KO                         | 160.0          |
| DHA                     | g/Kg KO                         | 60.0           |
| Choline                 | g/Kg KO                         | 59.8           |
| Water                   | g/Kg KO                         | 10.0           |
| Ethanol                 | g/Kg KO                         | 9.7            |
| Astaxathin (esterified) | mg/Kg KO                        | 529.0          |
| Peroxide                | mEq peroxide/Kg                 | 0.2            |
| Viscosity               | cP                              | 842.0          |
| Total aerobic count     | colony-forming units (cfu)/g KO | 10.0           |
| Total coliform          | colony-forming units (cfu)/g KO | 9.0            |
| E. coli                 | colony-forming units (cfu)/g KO | 0.0            |
| Salmonella              | colony-forming units (cfu)/g KO | 0.0            |



**Table S2. Microbial taxa with a significantly altered abundance.** CT: Uninfected control. CR: *Citrobacter rodentium* infected mice supplemented with PBS for 26 days. KO: *Citrobacter rodentium* infected mice supplemented with krill oil at 40 mg/Kg bodyweight/day for 26 days. The number denotes mean relative abundance  $\pm$  SD. LDA: Linear Discriminant Analysis. The *P* value was calculated using the Wilcoxon Rank Sum Test.

| <b>Genus</b>                            | <b>CT</b>       | <b>CR</b>        | <b>KO</b>        | <b>LDA</b> | <b><i>P</i> value</b> | <b>Significance</b> |
|-----------------------------------------|-----------------|------------------|------------------|------------|-----------------------|---------------------|
| <i>Adlercreutzia</i>                    | 0.41 $\pm$ 0.14 | 0.65 $\pm$ 0.30  | 0.53 $\pm$ 0.19  | 3.48       | 0.0210                | CT vs CR            |
| <i>Allobaculum</i>                      | 3.89 $\pm$ 3.89 | 11.23 $\pm$ 8.31 | 16.03 $\pm$ 9.22 | 4.51       | 0.0479                | CT vs CR            |
| <i>Clostridium</i>                      | 0.00 $\pm$ 0.01 | 0.00 $\pm$ 0.00  | 0.62 $\pm$ 1.75  | 3.54       | 0.0011                | CR vs KO            |
| <i>Lachnospiraceae_Clostridium</i>      | 0.34 $\pm$ 0.15 | 0.15 $\pm$ 0.09  | 0.14 $\pm$ 0.14  | 3.47       | 0.0024                | CT vs CR            |
| <i>Mucispirillum</i>                    | 0.31 $\pm$ 0.44 | 0.66 $\pm$ 0.68  | 0.53 $\pm$ 0.33  | 3.39       | 0.0347                | CT vs CR            |
| <i>Odoribacter</i>                      | 1.35 $\pm$ 0.38 | 0.73 $\pm$ 0.89  | 0.69 $\pm$ 0.44  | 3.52       | 0.0147                | CT vs CR            |
| <i>Roseburia</i>                        | 0.00 $\pm$ 0.00 | 0.00 $\pm$ 0.00  | 0.23 $\pm$ 0.30  | 3.12       | 0.0025                | CR vs KO            |
| <i>Sutterella</i>                       | 0.01 $\pm$ 0.03 | 0.28 $\pm$ 0.36  | 0.36 $\pm$ 0.55  | 3.44       | 0.0017                | CT vs CR            |
| <i>Unassigned Erysipelotrichaceae</i>   | 1.55 $\pm$ 0.50 | 2.55 $\pm$ 1.03  | 1.50 $\pm$ 0.61  | 3.78       | 0.0176                | CT vs CR & CR vs KO |
| <i>Unassigned_Christensenellaceae</i>   | 0.03 $\pm$ 0.02 | 0.04 $\pm$ 0.04  | 0.17 $\pm$ 0.09  | 3.05       | 0.0001                | CR vs KO            |
| <i>Unassigned_Clostridiales</i>         | 4.53 $\pm$ 3.24 | 1.80 $\pm$ 1.11  | 2.42 $\pm$ 1.57  | 4.10       | 0.0409                | CT vs CR            |
| <i>Unassigned_Clostridiales_1</i>       | 6.75 $\pm$ 2.73 | 3.22 $\pm$ 2.04  | 3.63 $\pm$ 1.46  | 4.21       | 0.0056                | CT vs CR            |
| <i>Unassigned_Enterobacteriaceae</i>    | 0.00 $\pm$ 0.01 | 0.43 $\pm$ 0.61  | 0.09 $\pm$ 0.15  | 3.38       | 0.0049                | CT vs CR            |
| <i>Unassigned_Lachnospiraceae</i>       | 5.02 $\pm$ 1.58 | 3.57 $\pm$ 1.24  | 3.47 $\pm$ 1.41  | 3.84       | 0.0479                | CT vs CR            |
| <i>Unassigned_Mogibacteriaceae</i>      | 0.13 $\pm$ 0.06 | 0.34 $\pm$ 0.17  | 0.21 $\pm$ 0.14  | 3.50       | 0.0024                | CT vs CR            |
| <i>Unassigned_Peptostreptococcaceae</i> | 0.00 $\pm$ 0.00 | 0.23 $\pm$ 0.43  | 0.16 $\pm$ 0.27  | 3.28       | 0.0053                | CT vs CR            |
| <i>Unassigned_Peptostreptococcaceae</i> | 0.00 $\pm$ 0.00 | 0.09 $\pm$ 0.19  | 0.04 $\pm$ 0.11  | 3.38       | 0.0117                | CT vs CR            |
| <i>Unassigned_Rikenellaceae</i>         | 3.87 $\pm$ 1.58 | 1.77 $\pm$ 1.45  | 1.54 $\pm$ 0.63  | 3.96       | 0.0046                | CT vs CR            |

**Table S3. Fecal metabolites significantly affected by krill oil supplementation in infectious colitis mice induced by *Citrobacter rodentium*.** The number denotes the normalized ion counts (mean  $\pm$  SD). CT: Uninfected control. CR: *Citrobacter rodentium* infected mice supplemented with PBS for 26 days. KO: *Citrobacter rodentium* infected mice supplemented with krill oil at 40 mg/Kg bodyweight/day for 26 days. The *P* value was calculated using the Wilcoxon Rank Sum Test (CR vs KO).

| Metabolite                                         | CT                  | CR                  | KO                 | <i>P</i> value |
|----------------------------------------------------|---------------------|---------------------|--------------------|----------------|
| 2(R)-hydroxydocosanoic acid                        | 1654.8 $\pm$ 1675.1 | 2082.5 $\pm$ 1031.9 | 667.9 $\pm$ 1095.6 | 0.0079         |
| 3-(Methylthio)-1-propene                           | 1.5 $\pm$ 0.2       | 2.3 $\pm$ 1.1       | 1.6 $\pm$ 0.6      | 0.0197         |
| 4-(2-Amino-3-hydroxyphenyl)-2,4-dioxobutanoic acid | 75.2 $\pm$ 17.8     | 28.3 $\pm$ 20.4**   | 55.9 $\pm$ 32.3    | 0.0357         |
| 4-Pyridoxic acid                                   | 88.7 $\pm$ 80.5     | 135.1 $\pm$ 73.7    | 40.40 $\pm$ 0.4    | 0.0028         |
| 5-Hydroxy-L-tryptophan                             | 27.6 $\pm$ 14.0     | 23.5 $\pm$ 19.2     | 42.8 $\pm$ 24.3    | 0.0159         |
| Acetanilide                                        | 414.0 $\pm$ 257.2   | 150.2 $\pm$ 185.0*  | 562.7 $\pm$ 372.1  | 0.0079         |
| Alanylglutamic acid                                | 26.1 $\pm$ 15.2     | 74.9 $\pm$ 58.9*    | 40.5 $\pm$ 16.9    | 0.0357         |
| Alanyltryptophan                                   | 3.0 $\pm$ 0.4       | 2.7 $\pm$ 0.5       | 3.4 $\pm$ 0.7      | 0.0159         |
| Dihydroferulic acid                                | 1.7 $\pm$ 0.9       | 2.3 $\pm$ 1.5       | 3.4 $\pm$ 0.9      | 0.0127         |
| Gabapentin                                         | 2.1 $\pm$ 0.3       | 1.9 $\pm$ 0.4       | 2.5 $\pm$ 0.5      | 0.0159         |
| Gamma-glutamylglutamic acid                        | 9.2 $\pm$ 6.8       | 2.1 $\pm$ 1.6*      | 6.1 $\pm$ 5.3      | 0.0295         |
| Gamma-glutamylleucine                              | 240.8 $\pm$ 249.0   | 433.8 $\pm$ 484.8   | 119.1 $\pm$ 154.2  | 0.0159         |
| Histamine                                          | 12.4 $\pm$ 8.9      | 43.6 $\pm$ 23.7**   | 21.2 $\pm$ 18.5    | 0.0295         |
| L-Asparagine                                       | 251.2 $\pm$ 285.8   | 181.6 $\pm$ 152.6   | 34.3 $\pm$ 44.8    | 0.0079         |
| Leu-Leu-Leu                                        | 0.4 $\pm$ 0.1       | 1.1 $\pm$ 1.0**     | 0.4 $\pm$ 0.1      | 0.0062         |
| L-iditol                                           | 80.1 $\pm$ 49.6     | 36.7 $\pm$ 43.0     | 98.7 $\pm$ 65.2    | 0.0159         |
| N-acetylleucine                                    | 122.0 $\pm$ 95.7    | 336.3 $\pm$ 459.1   | 95.4 $\pm$ 83.4    | 0.0242         |
| Oleic acid                                         | 17.5 $\pm$ 15.1     | 12.0 $\pm$ 2.8      | 14.3 $\pm$ 1.6     | 0.0430         |
| Phenol                                             | 427.5 $\pm$ 257.6   | 255.1 $\pm$ 204.1   | 580.0 $\pm$ 369.0  | 0.0357         |
| Phenylalanylglutamic acid                          | 105.5 $\pm$ 89.1    | 175.6 $\pm$ 144.1   | 70.6 $\pm$ 48.3    | 0.0430         |
| Ricinoleic acid                                    | 30.9 $\pm$ 15.8     | 23.7 $\pm$ 7.3      | 94.7 $\pm$ 27.1    | 0.0000         |
| Sulfolithocholic acid                              | 0.5 $\pm$ 0.5       | 0.4 $\pm$ 0.2       | 0.3 $\pm$ 0.1      | 0.0357         |
| Sulfolithocholyglycine                             | 142.5 $\pm$ 266.9   | 20.5 $\pm$ 11.4     | 31.0 $\pm$ 11.9    | 0.0430         |
| Valyl-histidine                                    | 4.6 $\pm$ 3.6       | 5.4 $\pm$ 4.3       | 2.0 $\pm$ 0.7      | 0.0159         |
| Valyl-phenylalanine                                | 11.1 $\pm$ 2.4      | 11.8 $\pm$ 6.8      | 6.3 $\pm$ 1.9      | 0.0101         |

Note: \*: *P* < 0.05 (CT vs CR); \*\*: *P* < 0.01 (CT vs CR)
